# Supplementary material for: Opto Field-Effect Transistors for Detecting Quercetin–Cu2+ Complex
Source: MDPI journal article supplement (doi:10.3390/s22197219), 2022-09-23
Supplement: s1 [file s1]

# Supplementary Materials

Pradhana Jati Budhi Laksana<sup>1,2,3</sup>, Li-Chu Tsai<sup>4,\*</sup>, Chang-Cheng Lin<sup>4</sup>, Kuei-Shu Chang-Liao<sup>1</sup>, Mathew K. Moodley<sup>5</sup>, and Chii-Dong Chen<sup>3,\*</sup>

## Device Fabrication

NW-FET chips were fabricated using top-down technology on six-inch silicon-on-insulator (SOI) wafers with 375 nm-thick oxides and 100 nm-thick top silicon. The top silicon layer of each SOI wafer was n-type doped with phosphorus at a concentration of  $1 \times 10^{11} \text{ cm}^{-2}$  and acceleration energy of 20 keV to achieve a concentration between  $10^{16} \text{ cm}^{-3}$  and  $10^{18} \text{ cm}^{-3}$ . Dopant activation was performed using rapid thermal annealing (RTA) at 1000 °C for 20 s. This layer was etched using conventional optical lithography and inductively-coupled plasma reactive-ion etching (ICP-RIE) to define the sensing region, including the source/drain and nanowire. The sensing area was isolated from the outside environment by a 15 nm-thick silicon oxide grown using a wet oxidation furnace at 900 °C. The sensing area was protected by a 150 nm-thick protective layer. The source and drain electrodes were subjected to additional doping of arsenic to a concentration of  $2 \times 10^{14} \text{ cm}^{-2}$ , followed by a 1000 °C 20 s activation process to reduce contact resistance. An oxide with a thickness of 600 nm was used for the interlayer dielectric (ILD) to prevent crosstalk between adjacent metal lines. A metal stack of 800 nm aluminum on 150 nm titanium was defined using the lift-off process for source/drain contacts. The source/drain line was then passivated by silicon oxide and nitride to avoid a direct connection to the sample solution. The length, width, and thickness of the silicon sensing wire between the source and drain electrodes were 2  $\mu\text{m}$ , 200 nm, and 100 nm, respectively.

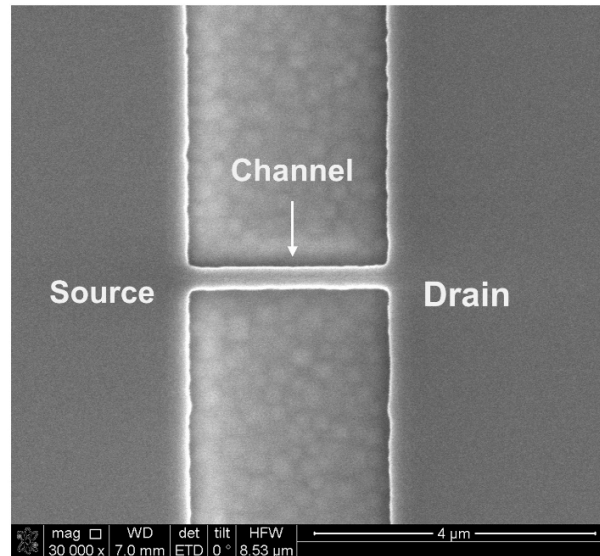

Figure S1. SEM image of the top view of the NW-FET channel area with a scale bar of 4  $\mu\text{m}$ .

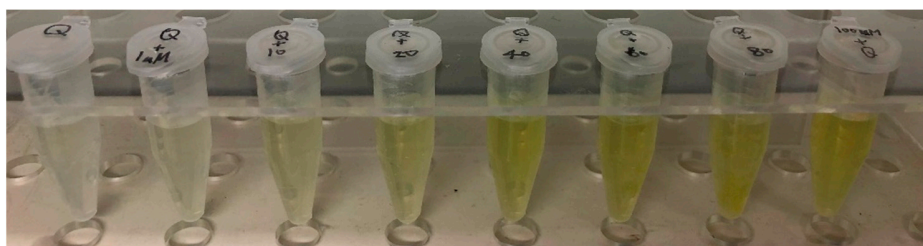

Figure S2. The visual change of molecular absorption of quercetin and  $\text{Cu}^{2+}$ . The free quercetin (left) followed by mixing of quercetin and various  $\text{Cu}^{2+}$  concentrations of 1, 10, 20, 40, 60, 80, and 100  $\mu\text{M}$ .
